# Supplementary material for: Enzymatic corn wet milling: engineering process and cost model
Source: PubMed Central journal article supplement (PMC2633287; doi:10.1186/1754-6834-2-2), 2009-01-21
Supplement: 1754-6834-2-2-S1.pdf [file 1754-6834-2-2-S1.pdf]

# Enzymatic Milling

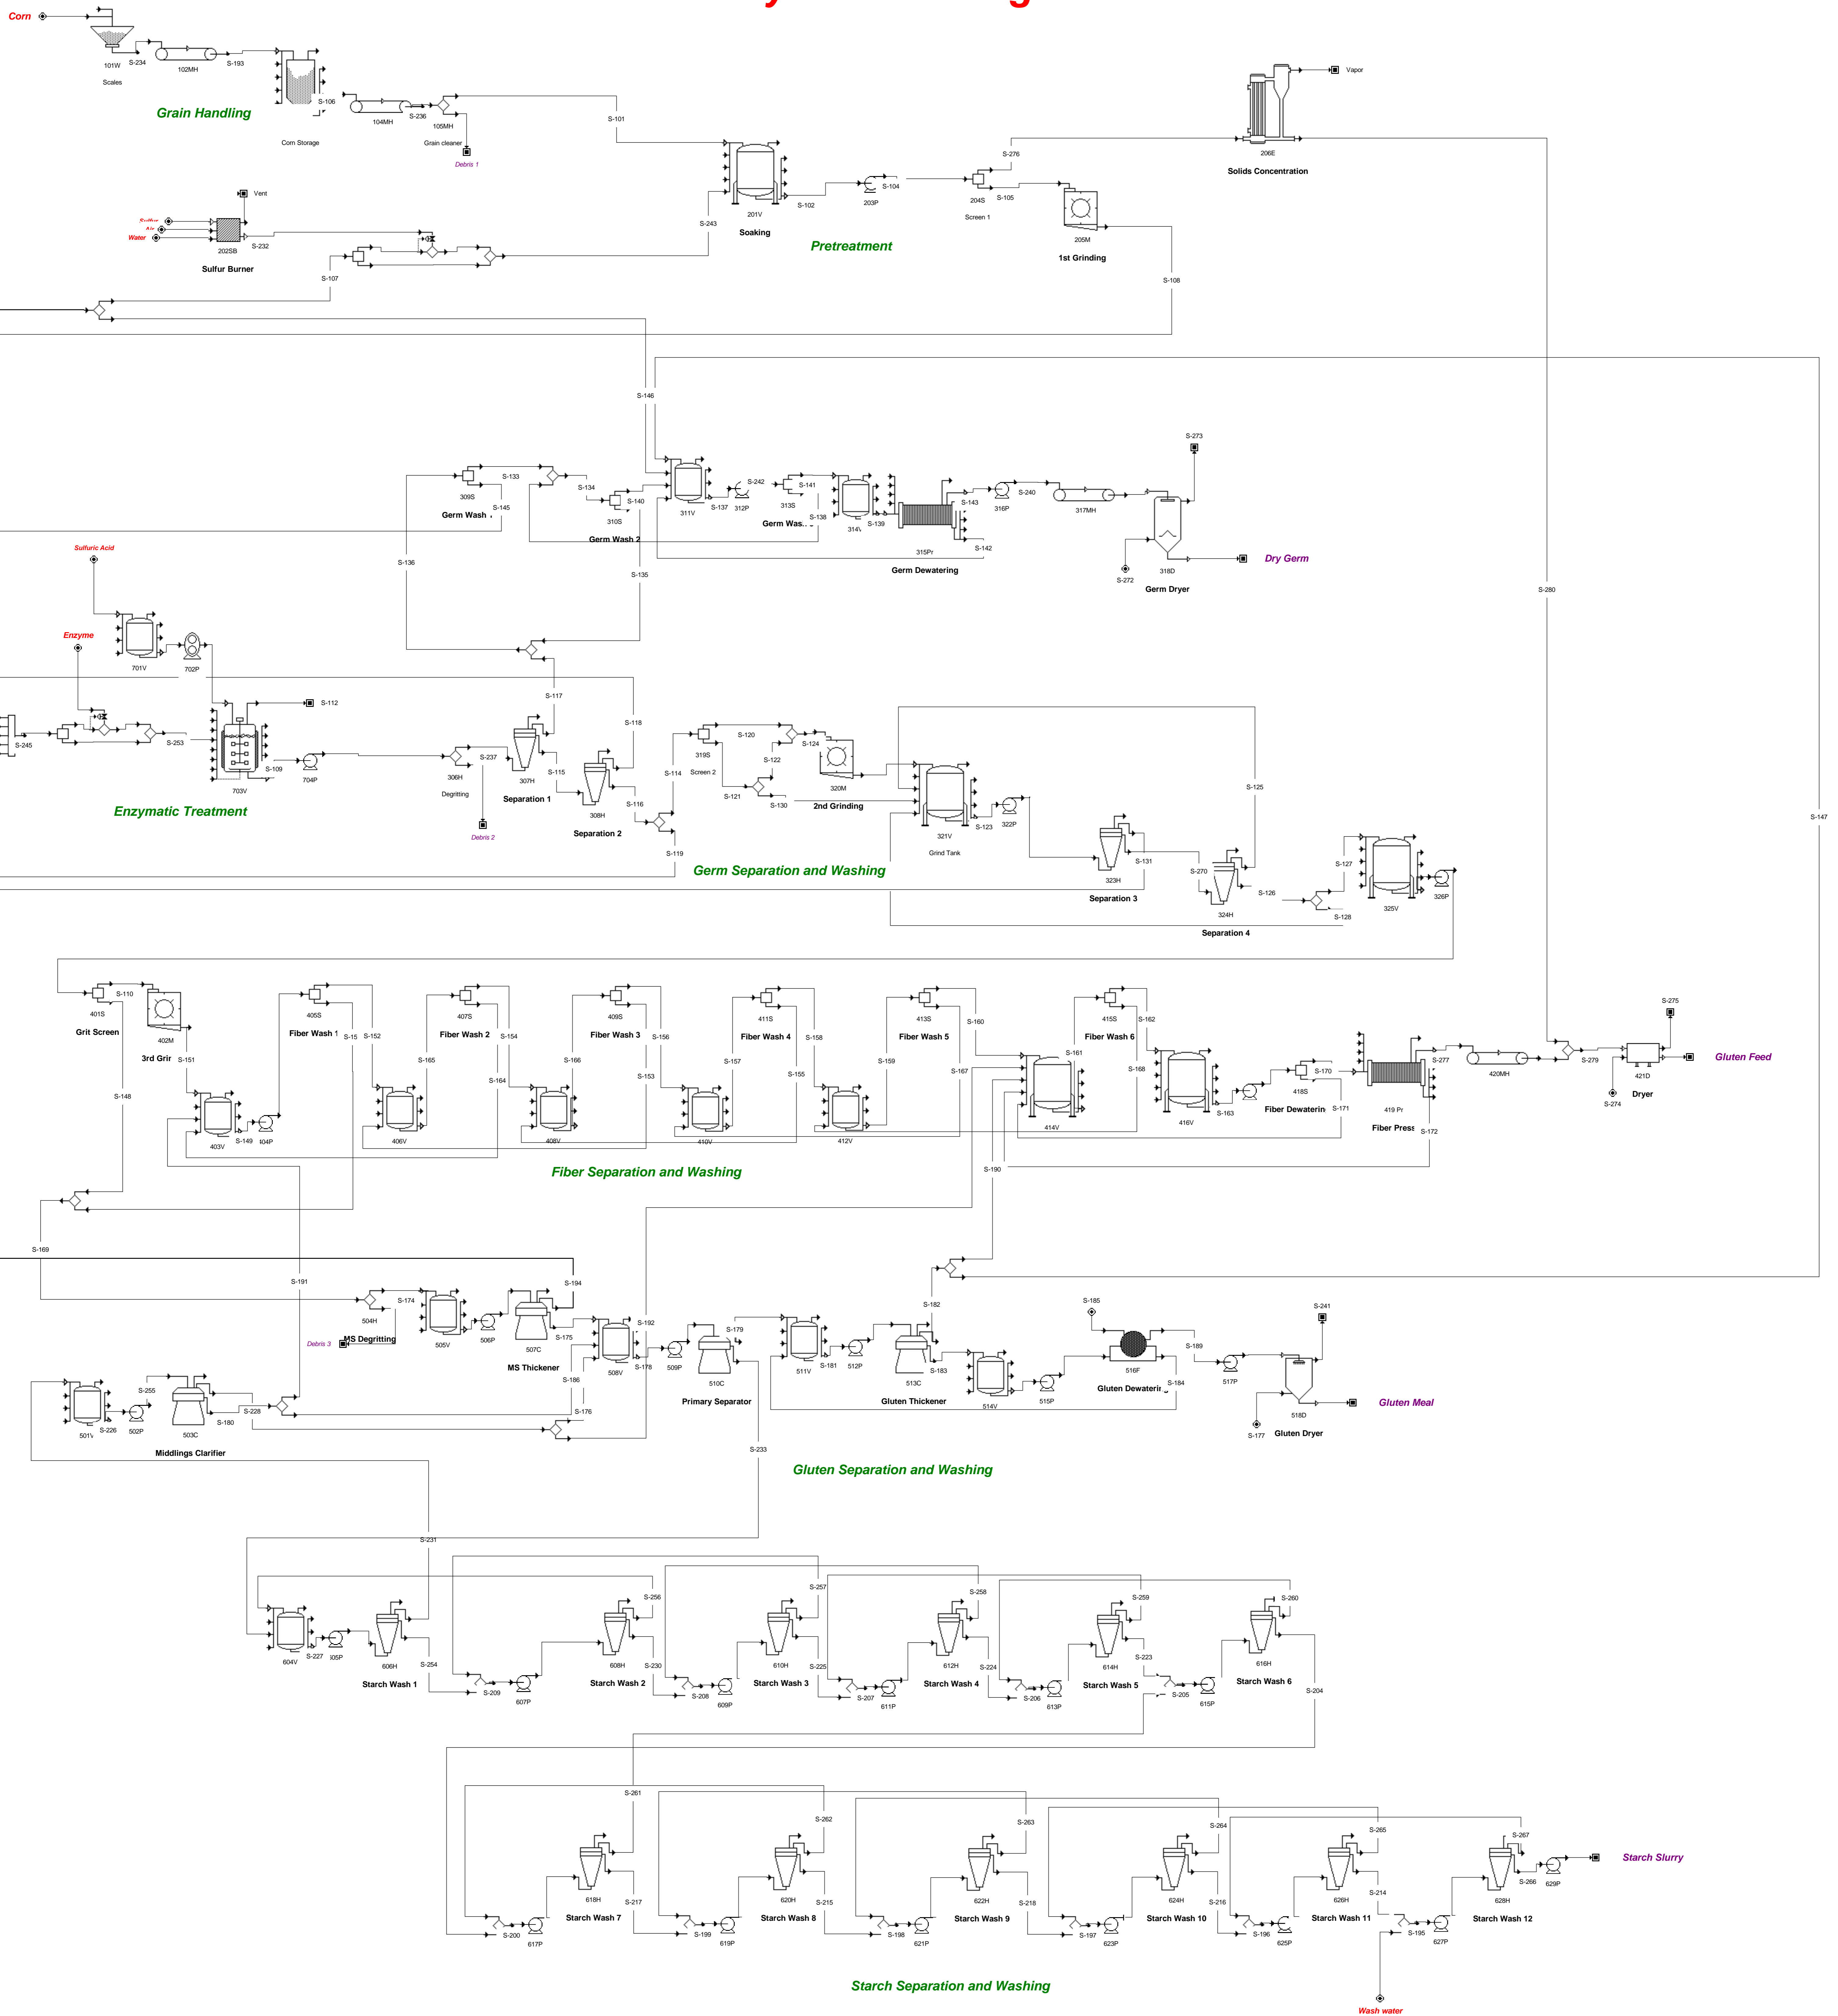

## DISCLAIMER

This simulation was developed for non-commercial research and educational uses only. The authors and the Agricultural Research Service of the US Department of Agriculture do not accept responsibility for its accuracy or for conclusions or decisions derived from it. For specific applications of this simulation, users should contact the authors for more detailed information, limitations and scope of the model.

|                                                                                                                            |                                                                       |
|----------------------------------------------------------------------------------------------------------------------------|-----------------------------------------------------------------------|
| U. S. DEPARTMENT OF AGRICULTURE<br>AGRICULTURAL RESEARCH SERVICE<br>EASTERN REGIONAL RESEARCH CENTER<br>WYNDMOOR, PA 19038 |                                                                       |
| <b>100,000 Bushels/Day Corn Enzymatic Model</b>                                                                            |                                                                       |
| CROP CONVERSION SCIENCE AND ENGINEERING UNIT                                                                               |                                                                       |
| LEAD SCIENTIST<br>PROCESS ANALYSIS<br>ECONOMIC ANALYSIS<br>LATEST REVISION                                                 | David Johnston<br>Edna Ramirez<br>Andrew McAloon<br>December 15, 2008 |
